# Supplementary material for: The Efficacy of Biologic Therapy for the Management of Palmoplantar Psoriasis and Palmoplantar Pustulosis: A Systematic Review
Source: Springer Nature journal article supplement (doi:10.1007/s13555-017-0207-0), 2017-11-15
Supplement: MOESM1 [file 15227024]

## Supplemental Information

### Figure 2: Search Strategy

EMBASE, MEDLINE via PubMed, and Cochrane Databases  
(from 1980 until August 21, 2017)

#1 palmoplantar OR “plamo plantar” OR “palmar plantar” OR palmoplantaris OR palmaris OR plantaris[tiab]  
#2 psoriasis OR pustule OR pustular OR pustulosis OR pustulosa  
#3 pustulosa palmaris OR “foot psoriasis”  
#4 hands[tiab] AND feet[tiab] AND psoriasis[tiab]  
#5 adalimumab OR etanercept OR infliximab OR ustekinumab OR secukinumab OR ixekizumab OR brodalumab OR guselkumab OR biologic agent\* OR biological agent\* OR biologic therap\* OR biological therapy\* OR biologics[tiab] OR antibodies, monoclonal[mh] OR monoclonal antibod\* OR mab[tiab] OR mabs[tiab]  
#6 (1 AND 2) OR 3 OR 4 AND 5
